# Supplementary material for: Overwintering Honey Bee Colonies: Effect of Worker Age and Climate on the Hindgut Microbiota
Source: Insects. 2021 Mar 5;12(3):224. doi: 10.3390/insects12030224 (PMC8000648; doi:10.3390/insects12030224)
Supplement: Supplementary file 1 [file insects-12-00224-s001.xlsx]

## Sheet:  S1 Bioinformatic Commands
Overwintering honey bee colonies: Effect of worker age and climate on the hindgut microbiota
By Patrick W. Maes, Amy S. Floyd, Brendon M. Mott and Kirk E. Anderson
Table S1. Mothur Bioinformatic commands used for this study
count.seqs(name=stability.trim.contigs.good.names, group=stability.contigs.good.groups)
Summary.seqs(count=stability.trim.contigs.good.count_table)
pcr.seqs(fasta=silva.bacteria.fasta,start=23444, end=37803, keepdots=F, processors=8)
rename.file(input=silva.bacteria.pcr.fasta, new=silva.v6-8.fasta)
summary.seqs(fasta=silva.v6-8.fasta)
align.seqs(fasta=stability.trim.contigs.good.unique.fasta, reference=silva.v6-8.fasta)
summary.seqs(fasta=stability.trim.contigs.good.unique.align, count=stability.trim.contigs.good.count_table)
screen.seqs(fasta=stability.trim.contigs.good.unique.align, count=stability.trim.contigs.good.count_table, summary=stability.trim.contigs.good.unique.summary, start=2, end=17012, maxhomop=8)
filter.seqs(fasta=stability.trim.contigs.good.unique.good.align, vertical=T, trump=.)
unique.seqs(fasta=stability.trim.contigs.good.unique.good.filter.fasta, count=stability.trim.contigs.good.good.count_table)
pre.cluster(fasta=stability.trim.contigs.good.unique.good.filter.unique.fasta, count=stability.trim.contigs.good.unique.good.filter.count_table, diffs=4)
chimera.uchime(fasta=stability.trim.contigs.good.unique.good.filter.unique.fasta, count=stability.trim.contigs.good.unique.good.filter.count_table, dereplicate=t, processors=12)
remove.seqs(fasta=stability.trim.contigs.good.unique.good.filter.unique.precluster.fasta, accnos=stability.trim.contigs.good.unique.good.filter.unique.precluster.denovo.vsearch.accnos)
summary.seqs(fasta=current, count=current)
classify.seqs(fasta=stability.trim.contigs.good.unique.good.filter.unique.precluster.pick.fasta, count=stability.trim.contigs.good.unique.good.filter.unique.precluster.denovo.vsearch.pick.count_table, reference=trainset9_032012.pds.fasta, taxonomy=trainset9_032012.pds.tax, cutoff=80)
remove.lineage(fasta=stability.trim.contigs.good.unique.good.filter.unique.precluster.pick.fasta, count=stability.trim.contigs.good.unique.good.filter.unique.precluster.denovo.vsearch.pick.count_table, taxonomy=stability.trim.contigs.good.unique.good.filter.unique.precluster.pick.pds.wang.taxonomy, taxon=Chloroplast-Mitochondria-unknown-Archaea-Eukaryota)
summary.tax(taxonomy=current, count=current)
awk '{ if ( $2 != "1" ) { print $0; } }'
awk '{ if ( $2 != "2" ) { print $0; } }'
list.seqs(count=Q2.chop.chop.count_table)
get.seqs(accnos=Q2.chop.chop.accnos, fasta=Q2.good.unique.good.filter.unique.precluster.pick.pick.fasta)
dist.seqs(fasta=stability.trim.contigs.good.unique.good.filter.unique.precluster.pick.pick.pick.fasta, cutoff=0.03)
cluster(column=stability.trim.contigs.good.unique.good.filter.unique.precluster.pick.pick.pick.dist, count=stability.trim.contigs.good.unique.good.filter.unique.precluster.denovo.vsearch.pick.pick.pick.count_table)
make.shared(list=stability.trim.contigs.good.unique.good.filter.unique.precluster.pick.pick.pick.opti_mcc.list, count=stability.trim.contigs.good.unique.good.filter.unique.precluster.denovo.vsearch.pick.pick.pick.count_table, label=0.03)
classify.otu(list=stability.trim.contigs.good.unique.good.filter.unique.precluster.pick.pick.pick.opti_mcc.list, count=stability.trim.contigs.good.unique.good.filter.unique.precluster.denovo.vsearch.pick.pick.pick.count_table, taxonomy=stability.trim.contigs.good.unique.good.filter.unique.precluster.pick.pds.wang.pick.pick.taxonomy, label=0.03)
count.groups(shared=stability.opti_mcc.shared)
rarefaction.single(shared=stability.opti_mcc.shared, calc=sobs, freq=100)
summary.single(shared=stability.opti_mcc.shared, calc=nseqs-coverage-sobs-invsimpson, subsample=T)

## Sheet: S2 Next-gen. sequencing summary
Overwintering honey bee colonies: Effect of worker age and climate on the hindgut microbiota
By Patrick W. Maes, Amy S. Floyd, Brendon M. Mott and Kirk E. Anderson
Table S2. 16S rRNA gene sequencing summary for each tissue and sampling location
Next Generation 16s rRNA gene Sequencing Summary
Section A- Total quatility filtered amplicon read numbers, average amplicons per library and standard deviation for both Ileum and Rectum samples.				Section B- Total quality filtered amplicon read numbers for each Known Age sample for each tissue (lleum and Rectum)			Section C- Total quality filtered amplicon read numbers for each Cold Winter sample for each tissue (Ileum and Rectum)			Section D- Total quality filtered amplicon read numbers for each Warm Winter sample for each tissue (Ileum and Rectum)
A				B			C			D
	Ileum	Rectum	Total	KA Samples			CW Samples			WW Samples
Total Retained Reads	3 55 423	3 530 577	7 084 800	Sample ID	Ileum	Rectum	Sample ID	Ileum	Rectum	Sample ID	Ileum	Rectum
Total # of Libraries	107	109	216	19171	34687	32022	FR181	20087	22044	D801	47999	43121
98% OTU's	2 667	2 667		19172	18361	30365	FR182	34911	38474	D802	35926	45320
Average # of Reads/Library	33 217	32 390		19173	36912	43878	FR183	21438	21031	D803	41064	42911
Standard Deviation	13 794	11 427		1981	23884	37942	FR184	20174	28998	D804	39901	35178
				1982		43685	FR31	34949	28641	D841	29077	28441
				1983	32684	29927	FR32	25809	37795	D842	49173	57034
				19S171	33674	31080	FR33	432	31834	D843	57825	32507
				19S172	28713	34253	FR34	37377	26669	D844	36284	33275
				19S173	30759	11266	FY11	28704	31884	D911	19581	26472
				19S81	30529	40941	FY12	21482	23256	D913	39787	31781
				19S82	38868	36988	FY13	20345	29645	D914	27816	27925
				19S83	39653	33700	FY14	27683	38180	D941	27371	26420
				33171	43401	36966	FY131	34201	35477	D942	60135	32349
				33172	31295	33611	FY132	37002	44734	D943	23320	28508
				33173	42497	30691	FY133	26281	32685	D944	32775	59430
				3381	28072	40465	FY134	46156	17404	F801	37809	42261
				3382	42185	36217	OR181	1334	599	F802	33112	44829
				3383	26081	42695	OR182	35858	33457	F803	45237	41265
				33S171	41264	52831	OR183	30022	20491	F804	39633	36204
				33S172	29023	42509	OR184	33712	34323	F841	33995	31866
				33S173	42524	39272	OR31	37708	28477	F842	48169	47316
				33S81	107487	48099	OR32	25514	31396	F843	42733	37076
				33S82	39681	9328	OR33	43331	25936	F844	42870	51480
				33S83	48919	49878	OR34	26992	25616	F911	56238	58229
				50171	44371	25299	OY11	36704	38861	F912	24055	26764
				50172	39913	57727	OY12	36090	24494	F913	52569	41117
				50173	51847	41352	OY13	23615	35512	F914	38298	40605
				5081	40808	40985	OY14	24225	25624	F941	40957	40999
				5082	42821	40112	OY131		31354	F942	44810	34929
				5083	39494	40632	OY132	1154	2691	F943	38820	30743
				50S171	22882	18547	OY133	34941	22779	F944	43752	42518
				50S172	13974	13424	OY134	32437	19945
				50S173	16448	15684
				50S81	46079	42645
				50S82	24230	21783
				50S83	18123	15980
				70171	17030	25167
				70172	17261	19739
				70173	28255	22062
				70174	19029	9848
				70175	4391	17508
				70S171	29430	21163
				70S172	13353	20869
				70S173	19205	13680
				70S174	19017	28975
				70S175	23350	19608

## Sheet: S3 Ileum comparisons
Overwintering honey bee colonies: Effect of worker age and climate on the hindgut microbiota
By Patrick W. Maes, Amy S. Floyd, Brendon M. Mott and Kirk E. Anderson
Table S3. Wilcoxon and MANOVA statistical summary for ileum microbiota comparisons
Green cells indicate a significantly higher abundance and red cells indicate significantly lower abundance. White cells indicate no difference. Raw and FDR probabilities due to multiple comparision are provided under each set of observations.
	Wilcoxon Summary						Higher	Lower									Manova Summary						Higher	Lower
	Known Age																Known Age Pillai's Trace- p = 0.09
		Firm5	Firm4	Bifidobacterium	S. alvi	G. apicola (1)	Gilliamella sp.	F. perrara	P. apium	L. kunkeei	B. apis	Actinobacteria	Enterobacteriales	Xanthomonadales	Other			Firm5	Firm4	Bifidobacterium	S. alvi	G. apicola	Gilliamella spp.	F. perrara	P. apium	L. kunkeei	B. apis	Actinobacteria	Enterobacteriales	Xanthomonadales	Other
	19 days																19 days
	33 days																33 days
	50 days																50 days
	70 days																70 days
	p-value	0.2806	0.9917	0.781	0.3015	0.0636	0.1184	0.8943	0.7858	0.0897	0.0379	0.3667	0.3469	0.6606	0.712		p-value	0.8592	0.9606	0.5454	0.1278	0.6138	0.1654	0.959	0.4523	0.1893	0.045	0.1348	0.0839	0.6875	0.7644
	FDR	0.6417	0.9917	0.9168	0.6417	0.4144	0.4144	0.9631	0.9168	0.4144	0.4144	0.6417	0.6417	0.9168	0.9168		FDR	0.9606	0.9606	0.9545	0.4417	0.9548	0.4417	0.9606	0.9046	0.4417	0.4417	0.4417	0.4417	0.9606	0.9606
	WW early / late winter																WW Pillai's Trace- p < 0.003
		Firm5	Firm4	Bifidobacterium	S. alvi	G. apicola (1)	Gilliamella sp.	F. perrara	P. apium	L. kunkeei	B. apis	Actinobacteria	Enterobacteriales	Xanthomonadales	Other			Firm5	Firm4	Bifidobacterium	S. alvi	G. apicola	Gilliamella spp.	F. perrara	P. apium	L. kunkeei	B. apis	Actinobacteria	Enterobacteriales	Xanthomonadales	Other
	Early																Early
	Late																Late
	p-value	0.6781	0.5271	0.8433	0.0398	0.4526	0.0001	0.1524	0.0397	0.9282	0.7187	0.032	0.0002	0.962	0.1331		p-value	0.0546	0.3555	0.7173	0.0793	0.554	0.0011	0.5017	0.9886	0.0528	0.2389	0.517	0.0177	0.0048	0.4401
	FDR	0.9147	0.8199	0.962	0.1114	0.7921	0.0014	0.3048	0.1114	0.962	0.9147	0.1114	0.0014	0.962	0.3048		FDR	0.1529	0.6221	0.7725	0.185	0.6463	0.0154	0.6463	0.9886	0.1529	0.4778	0.6463	0.0826	0.0336	0.6463
	CW early / late winter																CW Pillai's Trace- p < 0.03
		Firm5	Firm4	Bifidobacterium	S. alvi	G. apicola (1)	Gilliamella sp.	F. perrara	P. apium	L. kunkeei	B. apis	Actinobacteria	Enterobacteriales	Xanthomonadales	Other			Firm5	Firm4	Bifidobacterium	S. alvi	G. apicola	Gilliamella spp.	F. perrara	P. apium	L. kunkeei	B. apis	Actinobacteria	Enterobacteriales	Xanthomonadales	Other
	Early																Early
	Late																Late
	p-value	0.1013	0.4429	0.5614	0.0712	0.0327	0.0731	0.6932	0.0296	0.1503	0.6689	0.261	0.9291	0.2988	0.4186		p-value	0.1407	0.4081	0.7382	0.2412	0.1604	0.42	0.8928	0.0935	0.7574	0.4271	0.7535	0.4883	0.5865	0.4174
	FDR	0.2836	0.6201	0.7145	0.2559	0.2289	0.2559	0.7465	0.2289	0.3507	0.7465	0.522	0.9291	0.5229	0.6201		FDR	0.7474	0.7474	0.8157	0.7474	0.7474	0.7474	0.8928	0.7474	0.8157	0.7474	0.8157	0.7596	0.8157	0.7474
	WW/CW early winter																WW/CW ealry winter Pillai's Trace- p < 0.04
		Firm5	Firm4	Bifidobacterium	S. alvi	G. apicola (1)	Gilliamella sp.	F. perrara	P. apium	L. kunkeei	B. apis	Actinobacteria	Enterobacteriales	Xanthomonadales	Other			Firm5	Firm4	Bifidobacterium	S. alvi	G. apicola	Gilliamella sp.	F. perrara	P. apium	L. kunkeei	B. apis	Actinobacteria	Enterobacteriales	Xanthomonadales	Other
	WW																WW
	CW																CW
	p-value	0.025	0.71	0.27	0.06	0.21	0.1	0.1	0.4	0.04	0.09	0.009	0.05	0.31	0.53		p-value	0.1329	0.1654	0.0574	0.0048	0.9335	0.2437	0.0501	0.8115	0.3858	0.1455	0.2256	0.7781	0.7885	0.43
	FDR	0.168	0.71	0.378	0.168	0.3267	0.175	0.175	0.4667	0.168	0.175	0.126	0.168	0.3945	0.5708		FDR	0.3859	0.3859	0.2679	0.0672	0.9335	0.4265	0.2679	0.8739	0.6001	0.3859	0.4265	0.8739	0.8739	0.602
	WW/CW late winter																WW/CW late winter Pillai's Trace- p < 0.001
		Firm5	Firm4	Bifidobacterium	S. alvi	G. apicola	Gilliamella spp.	F. perrara	P. apium	L. kunkeei	B. apis	Actinobacteria	Enterobacteriales	Xanthomonadales	Other			Firm5	Firm4	Bifidobacterium	S. alvi	G. apicola	Gilliamella spp.	F. perrara	P. apium	L. kunkeei	B. apis	Actinobacteria	Enterobacteriales	Xanthomonadales	Other
	WW																WW
	CW																CW
	p-value	0.34	0.49	0.12	0.03	0.44	0.0001	0.51	0.002	0.01	0.29	0.36	0.0001	0.62	0.49		p-value	0.3895	0.7292	0.0918	0.0223	0.3659	0.0001	0.2471	0.8317	0.1051	0.7829	0.065	0.0113	0.0001	0.0902
	FDR	0.5492	0.5492	0.28	0.084	0.5492	0.0007	0.5492	0.0093	0.035	0.5492	0.5492	0.0007	0.62	0.5492		FDR	0.4957	0.8317	0.1836	0.0781	0.4957	0.0007	0.3844	0.8317	0.1839	0.8317	0.182	0.0527	0.0007	0.1836

## Sheet: S4 Rectum comparisons
Overwintering honey bee colonies: Effect of worker age and climate on the hindgut microbiota
By Patrick W. Maes, Amy S. Floyd, Brendon M. Mott and Kirk E. Anderson
Table S4. Wilcoxon and MANOVA statistical summary for rectum microbiota comparisons
Green cells indicate a significantly higher abundance and red cells indicate significantly lower abundance. White cells indicate no difference. Raw and FDR probabilities due to multiple comparision are provided under each set of observations.
	Wilcoxon Summary						Higher	Lower									Manova Summary						Higher	Lower
	Known Age																Known Age - Pillai's Trace- p = 0.09
		Firm5	Firm4	Bifidobacterium	S. alvi	G. apicola (1)	Gilliamella sp.	F. perrara	Bo. Apis	L. kunkeei	B. apis	Actinobacteria	Enterobacteriales	Xanthomonadales	Other			Firm5	Firm4	Bifidobacterium	S. alvi	G. apicola (1)	Gilliamella sp.	F. perrara	Bo. Apis	L. kunkeei	B. apis	Actinobacteria	Enterobacteriales	Xanthomonadales	Other
	19 days																19 days
	33 days																33 days
	50 days																50 days
	70 days																70 days
	p-value	0.0002	0.0135	0.0006	0.0004	0.0064	0.0017	0.1173	0.1195	0.9013	0.2171	0.0709	0.8604	0.185	0.0284		p-value	0.6434	0.7699	0.1503	0.3931	0.442	0.0054	0.9481	0.0059	0.5462	0.373	0.0213	0.0901	0.0981	0.9042
	FDR	0.0028	0.0315	0.0028	0.0028	0.0179	0.006	0.1673	0.1673	0.9013	0.2533	0.1241	0.9013	0.2355	0.0568		FDR	0.8189	0.8982	0.3507	0.6876	0.6876	0.0413	0.9481	0.0413	0.7647	0.6876	0.0994	0.2747	0.2747	0.9481
	WW early / late winter																WW - Pillai's Trace- p < 0.0001
		Firm5	Firm4	Bifidobacterium	S. alvi	G. apicola (1)	Gilliamella sp.	F. perrara	Bo. Apis	L. kunkeei	B. apis	Actinobacteria	Enterobacteriales	Xanthomonadales	Other			Firm5	Firm4	Bifidobacterium	S. alvi	G. apicola (1)	Gilliamella sp.	F. perrara	Bo. Apis	L. kunkeei	B. apis	Actinobacteria	Enterobacteriales	Xanthomonadales	Other
	Early																Early
	Late																Late
	p-value	0.6637	0.4065	0.9056	0.1921	0.8433	0.0001	0.1039	0.9824	0.2985	0.7446	1	0.0002	1	0.722		p-value	0.339	0.2288	0.1819	0.1812	0.0908	0.0001	0.3106	0.016	0.8588	0.24	0.1098	0.0014	0.0002	0.0577
	FDR	1	0.9485	1	0.6724	1	0.0014	0.4849	1	0.8358	1	1	0.0014	1	1		FDR	0.3651	0.3055	0.283	0.283	0.2119	0.0014	0.3624	0.056	0.8588	0.3055	0.2196	0.0065	0.0014	0.1616
	CW early / late winter																CW - Pillai's Trace- p = 0.31
		Firm5	Firm4	Bifidobacterium	S. alvi	G. apicola (1)	Gilliamella sp.	F. perrara	Bo. Apis	L. kunkeei	B. apis	Actinobacteria	Enterobacteriales	Xanthomonadales	Other			Firm5	Firm4	Bifidobacterium	S. alvi	G. apicola (1)	Gilliamella sp.	F. perrara	Bo. Apis	L. kunkeei	B. apis	Actinobacteria	Enterobacteriales	Xanthomonadales	Other
	Early																Early
	Late																Late
	p-value	0.2948	0.1547	0.8125	0.6073	0.5271	0.033	0.5789	0.0025	0.1305	0.6343	0.8949	0.4563	0.0299	0.0459		p-value	0.5806	0.0804	0.933	0.7126	0.623	0.0285	0.4287	0.0866	0.24	0.2279	0.8668	0.562	0.203	0.0369
	FDR	0.5896	0.361	0.875	0.74	0.74	0.154	0.74	0.035	0.361	0.74	0.8949	0.74	0.154	0.1607		FDR	0.7929	0.3031	0.933	0.8314	0.7929	0.2583	0.7502	0.3031	0.48	0.48	0.933	0.7929	0.48	0.2583
	WW/CW Early winter																WW/CW Early winter - Pillai's Trace- p < 0.002
		Firm5	Firm4	Bifidobacterium	S. alvi	G. apicola (1)	Gilliamella sp.	F. perrara	P. apium	L. kunkeei	B. apis	Actinobacteria	Enterobacteriales	Xanthomonadales	Other			Firm5	Firm4	Bifidobacterium	S. alvi	G. apicola (1)	G. apicola (2)	F. perrara	Bo. Apis	L. kunkeei	B. apis	Actinobacteria	Enterobacteriales	Xanthomonadales	Other
	WW																WW
	CW																CW
	p-value	0.06	0.32	0.05	0.62	0.08	0.49	0.41	0.78	1	0.06	0.13	0.01	0.04	0.06		p-value	0.9786	0.255	0.293	0.0212	0.2976	0.5547	0.0352	0.3757	0.6478	0.0256	0.7661	0.1201	0.1182	0.2599
	FDR	0.14	0.4978	0.14	0.7233	0.16	0.6236	0.574	0.84	1	0.14	0.2275	0.14	0.14	0.14		FDR	0.9786	0.4629	0.4629	0.1643	0.4629	0.706	0.1643	0.526	0.7558	0.1643	0.825	0.3363	0.3363	0.4629
	WW/CW Late winter																WW/CW Late winter - Pillai's Trace- p < 0.0001
		Firm5	Firm4	Bifidobacterium	S. alvi	G. apicola (1)	Gilliamella sp.	F. perrara	P. apium	L. kunkeei	B. apis	Actinobacteria	Enterobacteriales	Xanthomonadales	Other			Firm5	Firm4	Bifidobacterium	S. alvi	G. apicola (1)	Gilliamella sp.	F. perrara	P. apium	L. kunkeei	B. apis	Actinobacteria	Enterobacteriales	Xanthomonadales	Other
	WW																WW
	CW																CW
	p-value	0.3	0.49	0.24	1	0.24	0.0001	0.34	0.004	0.02	0.19	0.18	0.0001	1	0.46		p-value	0.0047	0.0269	0.9345	0.0375	0.4328	0.0001	0.6429	0.0383	0.827	0.9784	0.0628	0.0001	0.0001	0.0063
	FDR	0.4667	0.5717	0.42	1	0.42	0.0007	0.476	0.0187	0.07	0.42	0.42	0.0007	1	0.5717		FDR	0.0165	0.0628	0.9784	0.067	0.6059	0.0005	0.8182	0.067	0.9648	0.9784	0.0977	0.0005	0.0005	0.0176

## Sheet: S5 Bacterial-fungal abundance
Overwintering honey bee colonies: Effect of worker age and climate on the hindgut microbiota
By Patrick W. Maes, Amy S. Floyd, Brendon M. Mott and Kirk E. Anderson
Table S5. Statistical summary of Bacterial and Fungal abundance determined by universal primers
	Summary comparing ileum and rectum absolute abundance for total Fungi and Bacteria. Green boxes indicate a significantly higher abundance and red boxes indicate significantly lower abundance. FDR probabilities are provided under each set of observations.
	ILEUM ABUNDANCE				RECTUM ABUNDANCE					Higher	Lower
	Bacteria		Fungus		Bacteria		Fungus
	KA		KA		KA		KA
	Age		Age		Age		Age
	19		19		19		19
	33		33		33		33
	50		50		50		50
	70		70		70		70
	p	0.24	p	0.58	p	0.0004	p	0.012
	WW		WW		WW		WW
	Pre		Pre		Pre		Pre
	Post		Post		Post		Post
	p	0.33	p	0.004	p	0.45	p	0.002
	CW		CW		CW		CW
	Pre		Pre		Pre		Pre
	Post		Post		Post		Post
	p	0.08	p	0.65	p	0.14	p	0.55
	WW/CW Early		WW/CW Early		WW/CW Early		WW/CW Early
	WW		WW		WW		WW
	CW		CW		CW		CW
	p	0.72	p	0.38	p	0.11	p	0.11
	WW/CW Late		WW/CW Late		WW/CW Late		WW/CW Late
	WW		WW		WW		WW
	CW		CW		CW		CW
	p	0.49	p	0.08	p	0.3	p	<0.0001

## Sheet: S6 Repeated measures analysis 
Overwintering honey bee colonies: Effect of worker age and climate on the hindgut microbiota
By Patrick W. Maes, Amy S. Floyd, Brendon M. Mott and Kirk E. Anderson
Table S6. Repeated measures MANOVA and ANOVA results examining the interaction between time and overwintering environment.
Time (early vs. late winter) was the within-subjects independent variable, and Environment (WW vs. CW) was the between-subjects independent variable.
Interaction plots (summarized to the right) are labeled CW for cold winter (red lines) and WW for warm winter (blue lines).
The dependent variables (OTU normalized cell counts) were converted to centered log ratios for this analysis.																		Interaction plots with False Discovery Rate (FDR) for Time * Environment interaction effect.
Ileum RM Multivariate Tests								Rectum RM Multivariate Tests										Ileum								Rectum
Effect		Value	F	Hypothesis df	Error df	Sig.		Effect		Value	F	Hypothesis df	Error df	Sig.				OTU	p-value	FDR						OTU	p-value	FDR
Environment	Pillai's Trace	0.741457	3.530b	13	16	0.00958406		Environment	Pillai's Trace	0.927	15.559b	13	16	0				Lactobacillus Firm5	0.03	0.21						Lactobacillus Firm5	0.25	0.39
	Wilks' Lambda	0.258543	3.530b	13	16	0.00958406			Wilks' Lambda	0.073	15.559b	13	16	0
	Hotelling's Trace	2.86783	3.530b	13	16	0.00958406			Hotelling's Trace	12.642	15.559b	13	16	0
	Roy's Largest Root	2.86783	3.530b	13	16	0.00958406			Roy's Largest Root	12.642	15.559b	13	16	0
Time	Pillai's Trace	0.620201	2.010b	13	16	0.0933769		Time	Pillai's Trace	0.59	1.774b	13	16	0.14
	Wilks' Lambda	0.379799	2.010b	13	16	0.0933769			Wilks' Lambda	0.41	1.774b	13	16	0.14
	Hotelling's Trace	1.63297	2.010b	13	16	0.0933769			Hotelling's Trace	1.442	1.774b	13	16	0.138
	Roy's Largest Root	1.63297	2.010b	13	16	0.0933769			Roy's Largest Root	1.442	1.774b	13	16	0.138
Time* Environment	Pillai's Trace	0.753788	3.768b	13	16	0.00699448		Time* Environment	Pillai's Trace	0.838	6.361b	13	16	0				Lactobacillus Firm4	0.78	0.92						Lactobacillus Firm4	0.05	0.18
	Wilks' Lambda	0.246212	3.768b	13	16	0.00699448			Wilks' Lambda	0.162	6.361b	13	16	0
	Hotelling's Trace	3.06154	3.768b	13	16	0.00699448			Hotelling's Trace	5.168	6.361b	13	16	0
	Roy's Largest Root	3.06154	3.768b	13	16	0.00699448			Roy's Largest Root	5.168	6.361b	13	16	0
Univariate test results by OTU (Ileum)								Univariate test results by OTU (Rectum)
																		Bifidobacterium	0.86	0.92						Bifidobacterium	0.49	0.66
																		Snodgrassella alvi	0.74	0.92						Snodgrassella alvi	0.61	0.66
																		Gilliamella apicola	0.19	0.44						Gilliamella apicola	0.2	0.39
																		Gilliamella spp.	0.0007	0.01						Gilliamella spp.	0.0001	0.001
																		Frischella perrara	0.69	0.92						Frischella perrara	0.22	0.39
																		Bombella apis	0.19	0.44						Bombella apis	0.78	0.78
																		Lactobacillus kunkeei	0.25	0.5						Lactobacillus kunkeei	0.55	0.66
																		Bartonella apis	0.09	0.42						Bartonella apis	0.09	0.28
																		Actinobacteria	0.92	0.92						Actinobacteria	0.22	0.39
																		Enterobacteriales	0.01	0.05						Enterobacteriales	0.007	0.03
																		Xanthomonadales	0.28	0.51						Xanthomonadales	0.57	0.66
																		Other	0.8	0.92						Other	0.002	0.01
